# Supplementary material for: Cobalt Phthalocyanine-Doped Polymer-Based Electrocatalyst for Rechargeable Zinc-Air Batteries
Source: MDPI journal article supplement (doi:10.3390/ma16145105), 2023-07-20
Supplement: s1 [file s1]

*Supplementary Materials*

# **Cobalt Phthalocyanine-Doped Polymer-Based Electrocatalyst for Rechargeable Zinc-Air Batteries**

**Yogesh Kumar <sup>1</sup>, Srinu Akula <sup>1</sup>, Elo Kibena-Pöldsepp <sup>1</sup>, Maike Käärik <sup>1</sup>, Jekaterina Kozlova <sup>2</sup>, Arvo Kikas <sup>2</sup>, Jaan Aruväli <sup>3</sup>, Vambola Kisand <sup>2</sup>, Jaan Leis <sup>1</sup>, Aile Tamm <sup>2</sup> and Kaido Tammeveski <sup>1,\*</sup>**

<sup>1</sup> Institute of Chemistry, University of Tartu, 50411 Tartu, Estonia; yogesh.kumar@ut.ee (Y.K.); srinu.akula@ut.ee (S.A.); elo.kibena-poldsepp@ut.ee (E.K.-P.); maike.kaarik@ut.ee (M.K.); jaan.leis@ut.ee (J.L.)

<sup>2</sup> Institute of Physics, University of Tartu, 50411 Tartu, Estonia; jekaterina.kozlova@ut.ee (J.K.); arvo.kikas@ut.ee (A.K.); vambola.kisand@ut.ee (V.K.); aile.tamm@ut.ee (A.T.)

<sup>3</sup> Institute of Ecology and Earth Science, University of Tartu, 50409 Tartu, Estonia; jaan.aruvali@ut.ee

\* Correspondence: kaido.tammeveski@ut.ee

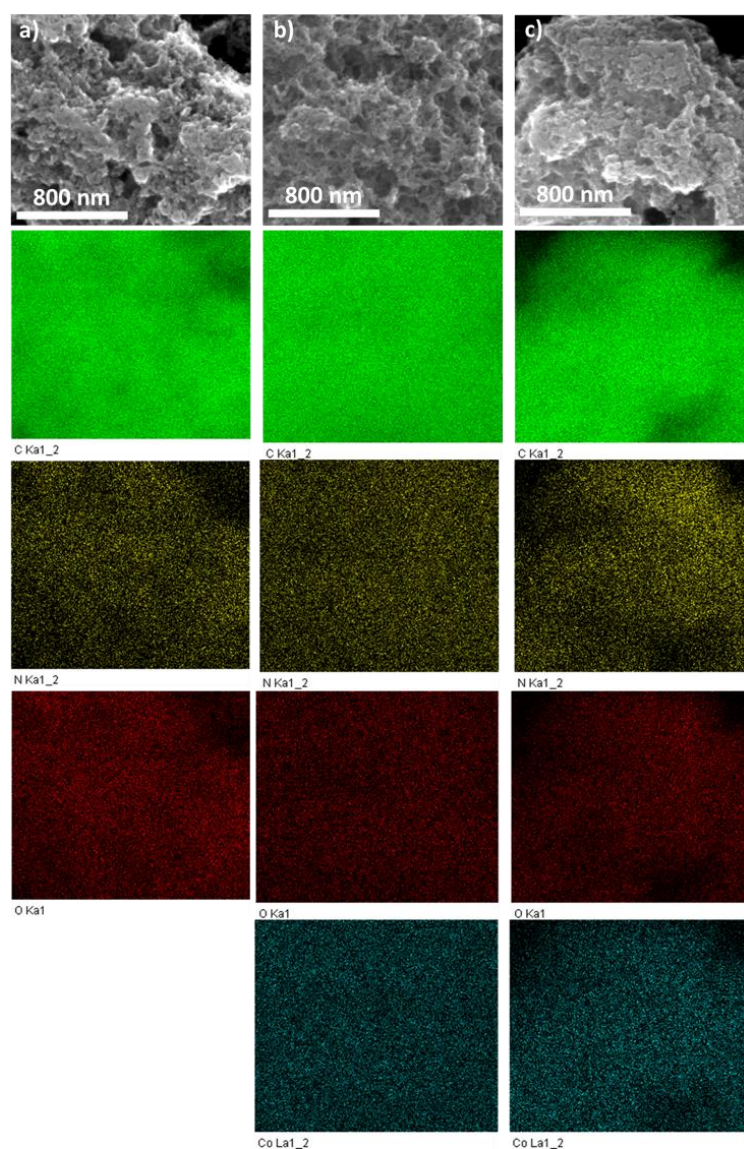

**Figure S1.** Elemental maps of C, N, O, and Co obtained from SEM-EDX of (a) PC-800, (b) CoN-PC-1, and (c) CoN-PC-2.

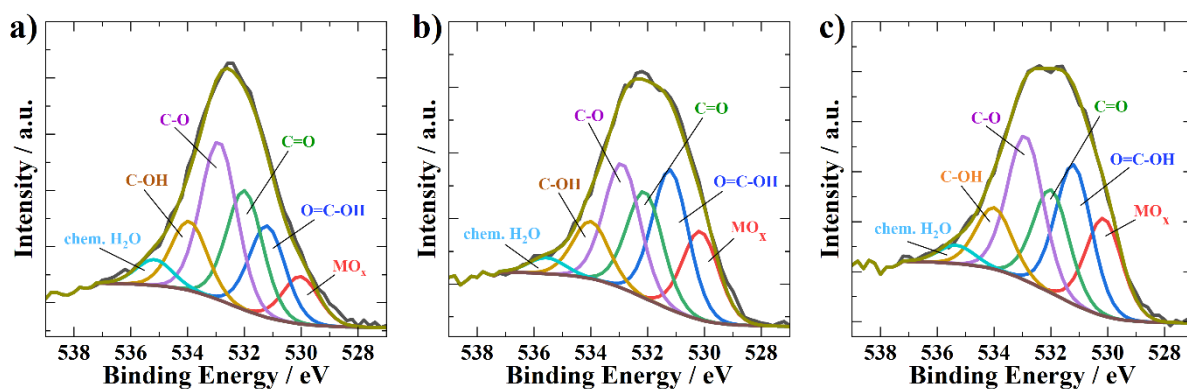

**Figure S2.** O 1s high-resolution XPS spectra of a) PC-800, b) CoN-PC-1, and c) CoN-PC-2.

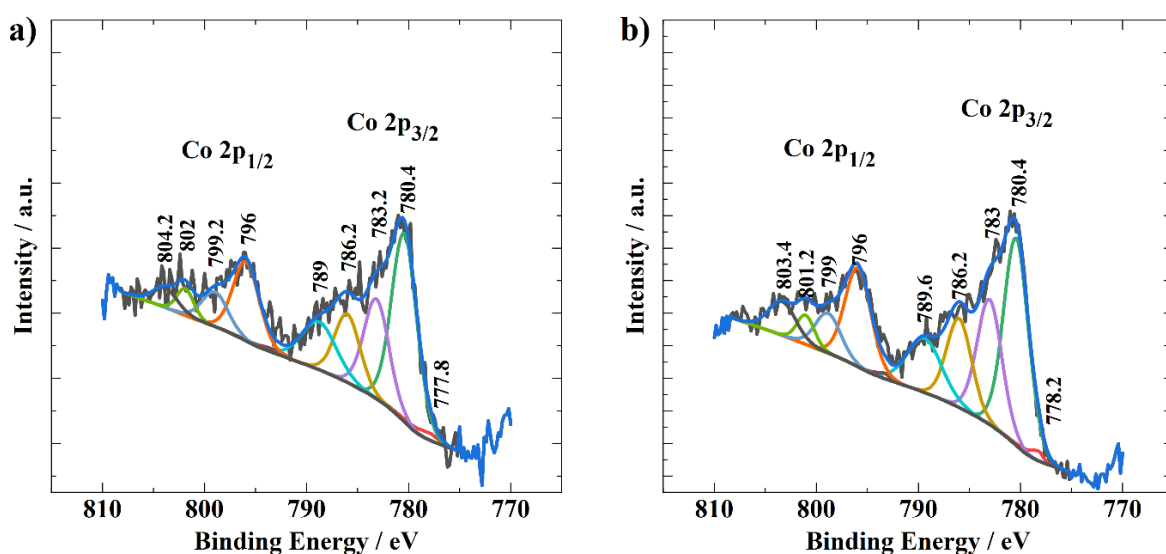

Figure S3. Deconvoluted Co 2p XPS spectra for a) CoN-PC-1 and b) CoN-PC-2 catalysts.

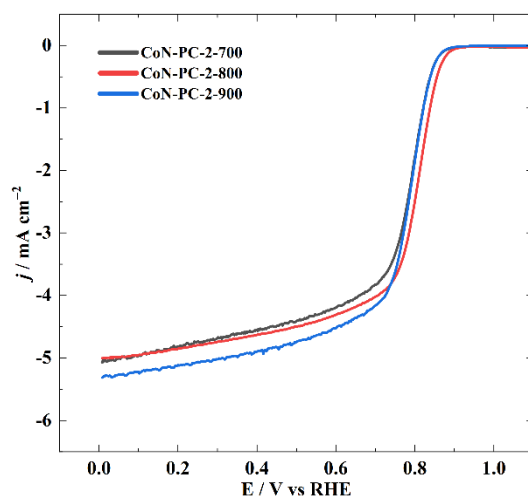

Figure S4. ORR polarisation curves for catalysts prepared at different temperatures. Test conditions: O<sub>2</sub>-saturated 0.1 M KOH solution,  $\nu = 10 \text{ mV s}^{-1}$ ,  $\omega = 1900 \text{ rpm}$ .

Table S1. ORR parameters in 0.1 M KOH for catalysts prepared at different temperatures.

| Catalyst     | $E_{\text{onset}} / \text{V}$ | $E_{1/2} / \text{V}$ |
|--------------|-------------------------------|----------------------|
| CoN-PC-2-700 | 0.87                          | 0.78                 |
| CoN-PC-2-800 | 0.88                          | 0.81                 |
| CoN-PC-2-900 | 0.88                          | 0.78                 |

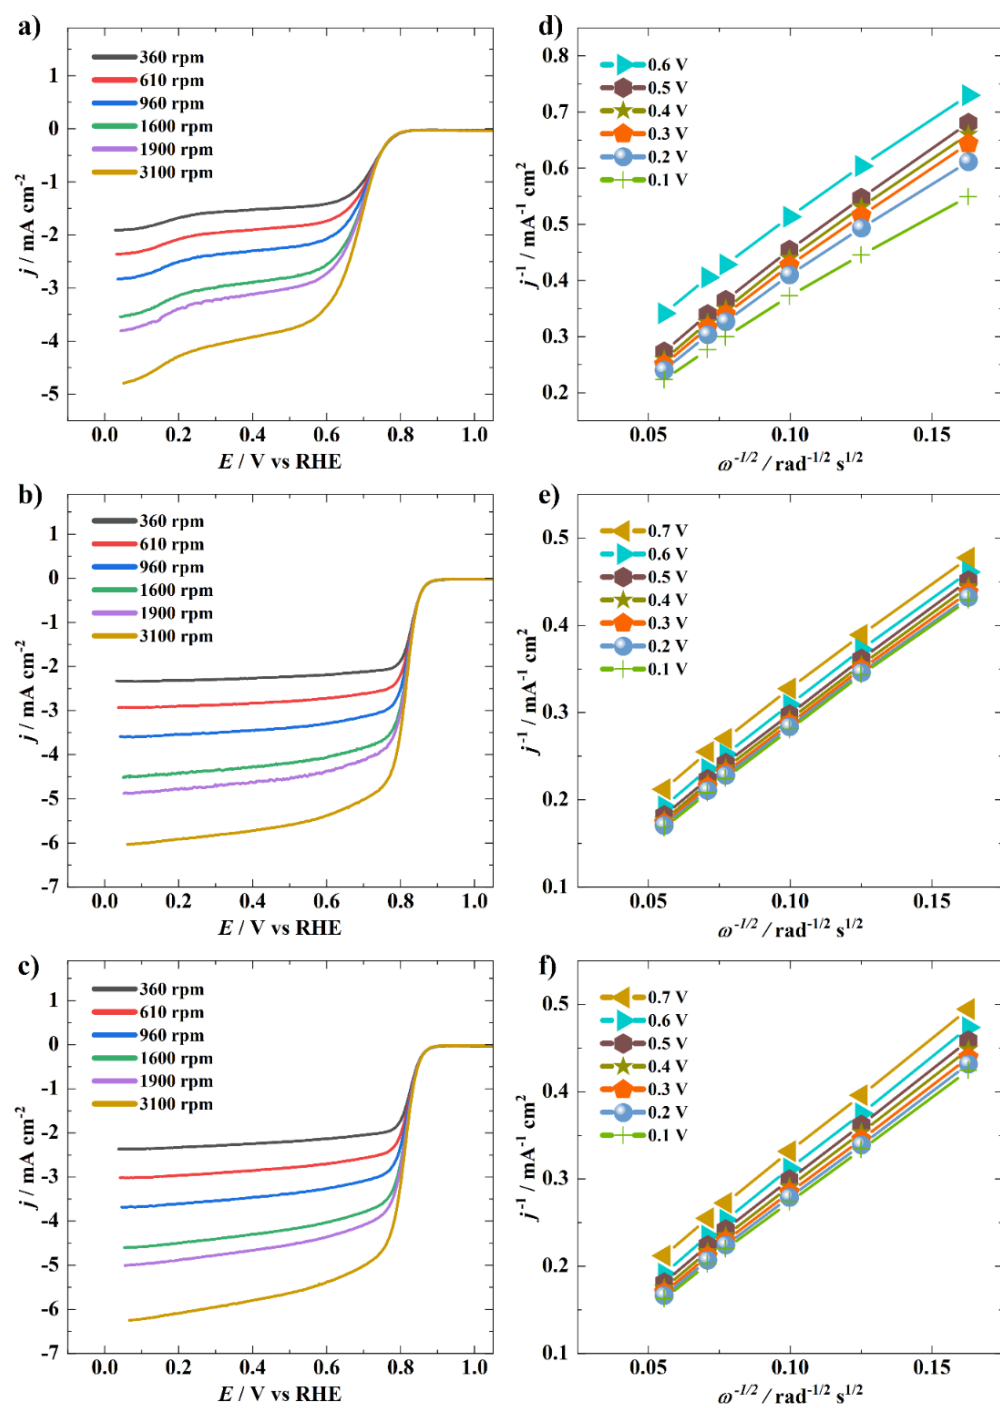

**Figure S5.** ORR polarisation curves at different rotation rates for (a) PC-800, (b) CoN-PC-1, and (c) CoN-PC-2 in O<sub>2</sub>-saturated 0.1 M KOH solution. Koutechy-Levich (K-L) plots for (d) PC-800, (e) CoN-PC-1, and (f) CoN-PC-2 derived from the respective polarisation curves.

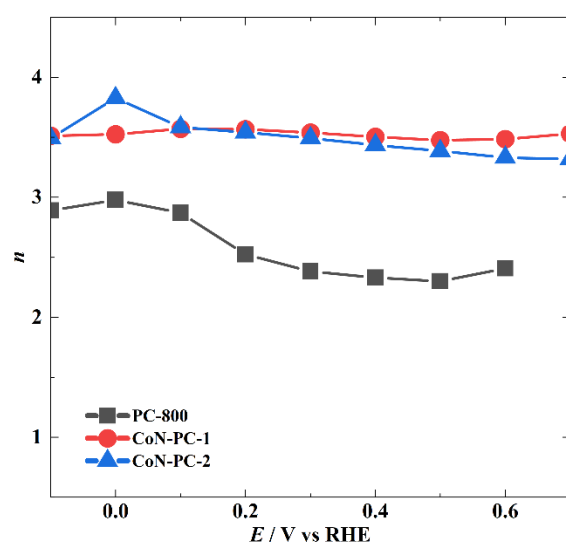

Figure S6. Number of transferred electrons per  $O_2$  molecule derived from the K-L plots.

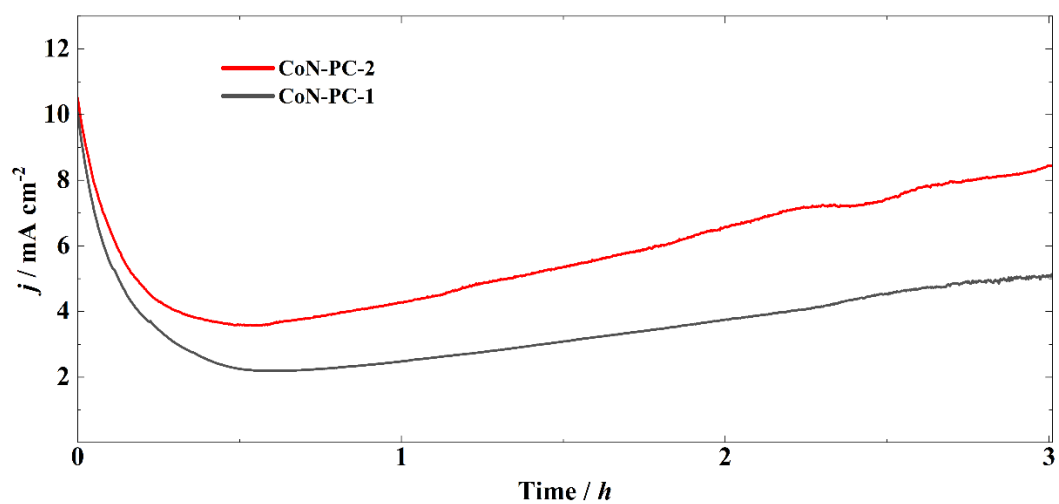

Figure S7. OER stability test for CoN-PC-1 and CoN-PC-2 at 1.7 V for 3 h ( $\omega = 1900$  rpm).
